# Supplementary material
Source: publisher figshare collection journal article supplement (https://karger.figshare.com/articles/dataset/_/24083496)
Supplement: Supplementary file 2 [file 3]

**Supplements**

**Supplement 1:**

Differentiation of CD34+ cells from very immature multipotent progenitors (MPPs) to mature progenitor cells of the human hematopoietic system. Red arrow symbolizes the change in the differentiation of CD34+ cells in autologous material after cryopreservation compared with fresh material: MPPs differentiated into more mature stages of lympho-myeloid progenitors (LMPPs), whereas LMPPs followed the pathway to multi-lymphoid progenitors (MLPs). Modified from Dmytrus et al. (28). Created with BioRender.com.

**Supplement 2:**

Gating strategy.

First row: We defined the beads, excluded debridement, located single cells via doublet exclusion and set the 7-Aminoactinomycin D = 7AAD-negative gate for viable cells.

Second row: Single cells were plotted as Side Scatter = SSC-A vs. Phycoerythrin = PE to show the typical CD34+ population. The 7AAD gate was set according to the unstained control to exclude nonviable CD34+ cells. The remaining cells were visualized based on their weak CD45 positivity and typical position in the lympho-monocytic region of the SSC vs. Forward Scatter = FSC plot. Non-specific CD38 binding and resulting non-specific signals were subsequently excluded by outgating.

Third row: The resulting population of specifically gated CD34+ cells was subjected to subpopulation gating starting with the expression of CD45RA.

(A) CD45RA+ subpopulations: BLPs (B-lymphoid progenitors), MLPs (multi-lymphoid progenitors), late GMPs (granulocyte and macrophage progenitors), and LMPPs (lympho-myeloid progenitors).

(B) CD45RA- subpopulations: EMPs (erythroid-myeloid progenitors) and MPPs (multipotent progenitors).

**Supplement 3:**

Distribution of hematopoietic stem and progenitor cell (HSPC) subpopulations according to CD45RA expression.

A) Relative percentages of subpopulations among viable CD34+ cells (CD45RA+, mean: 63.8%, SD: 19.4; CD45RA-, mean: 36.2%, SD: 19.4).

B) Absolute numbers x106/kg body weight (CD45RA+, mean: 1.01 x106 /kg bw, SD 0.82; CD45RA-, mean: 0.51 x106 /kg bw, SD 0.35).
