# Supplementary material
Source: publisher figshare collection journal article supplement (https://karger.figshare.com/articles/dataset/_/24083496)

Supplement 1

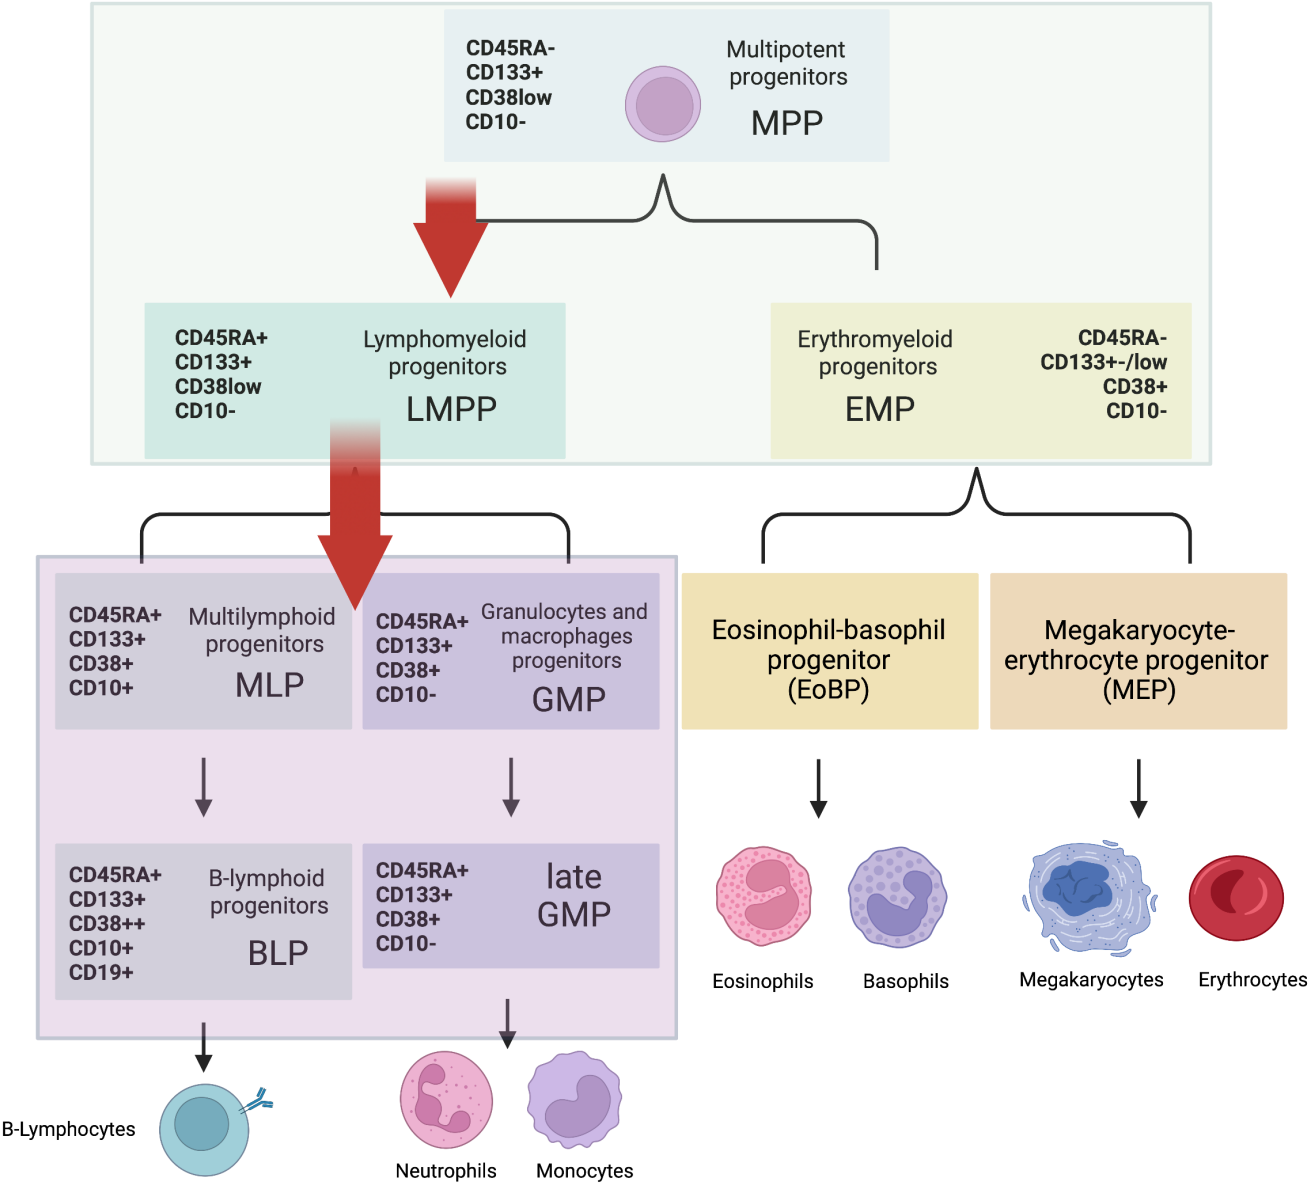

# Supplement 2

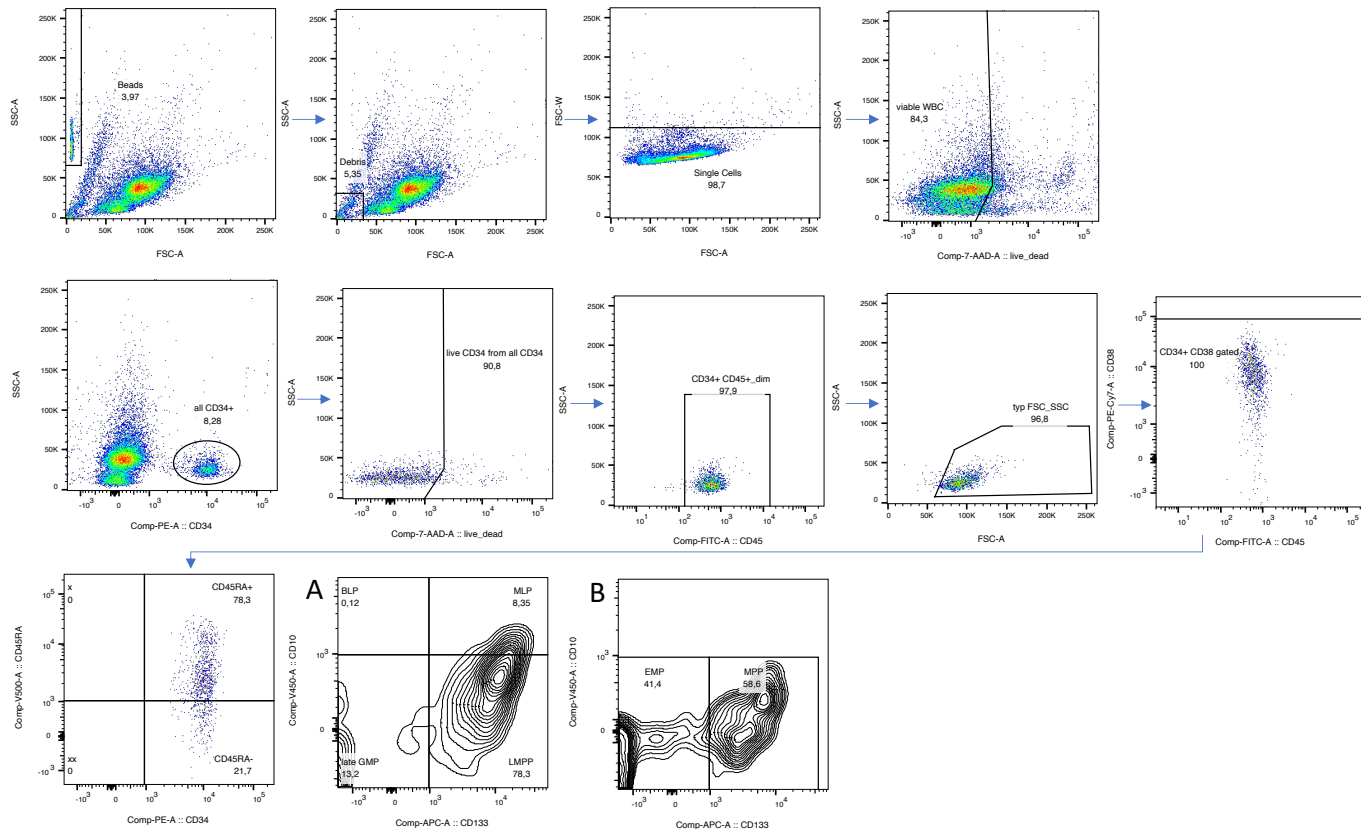

## Supplement 3

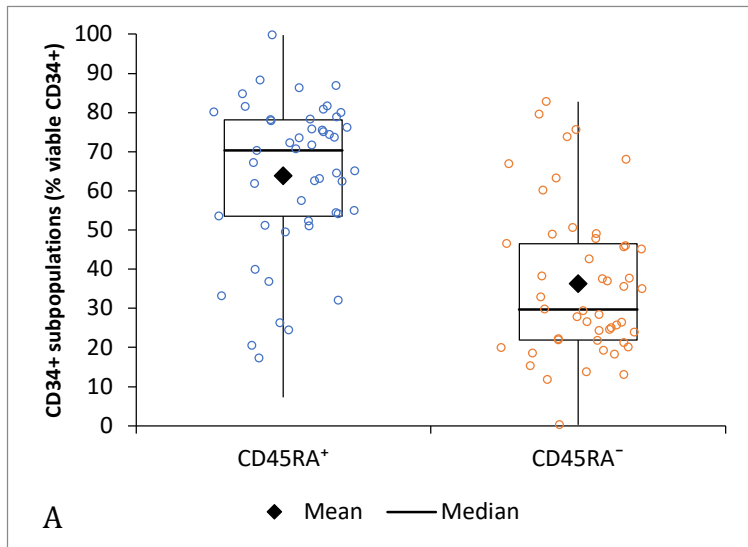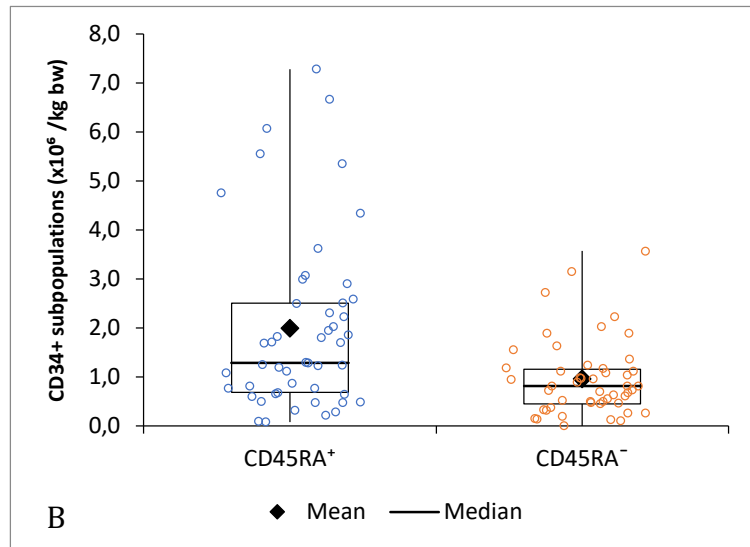

Supplement: Supplementary file 1 [file 1]

Supplement 1



# Supplement 2



Supplement 3

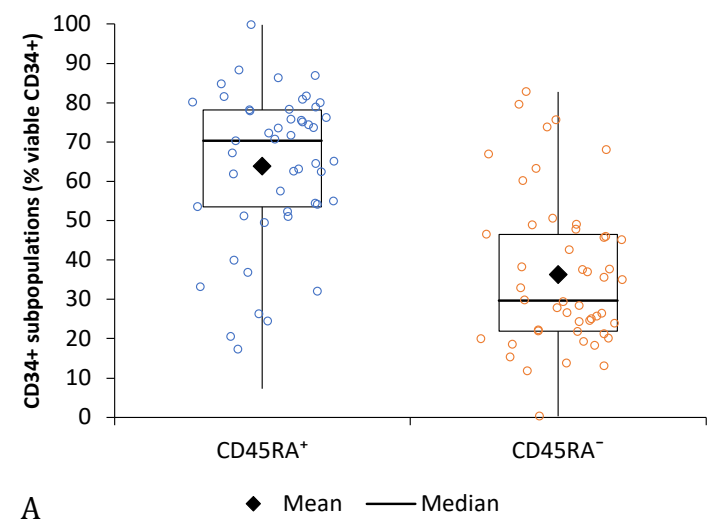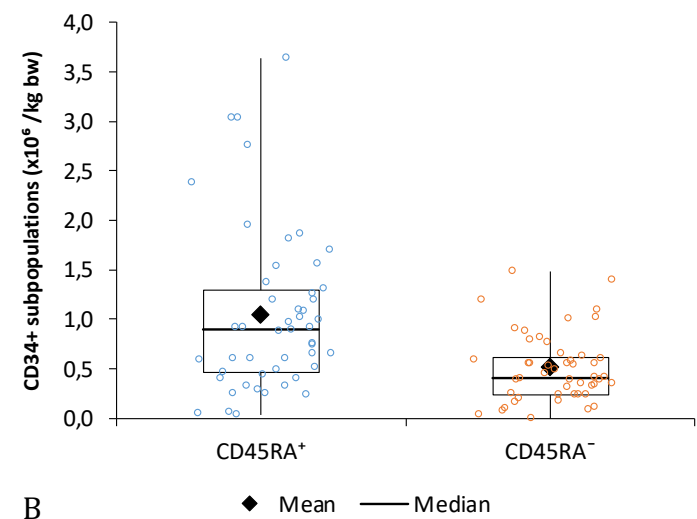

Supplement: Supplementary file 2 [file 3]
